# Supplementary material for: Dynamics of Physicochemical Properties, Functional Compounds and Antioxidant Capacity during Spontaneous Fermentation of Lycium ruthenicum Murr. (Qinghai–Tibet Plateau) Natural Vinegar
Source: MDPI journal article supplement (doi:10.3390/foods11091344), 2022-05-05
Supplement: s1 [file s1]

Supplementary

# Dynamics of physicochemical Properties, Functional Compounds and Antioxidant Capacity during Spontaneous Fermentation of *Lycium Ruthenicum* Murr. (Qinghai–Tibet Plateau) Natural Vinegar

Qingchao Gao <sup>1,†</sup>, Yangbo Song <sup>1,†</sup>, Ying Liang <sup>2</sup>, Yahui Li <sup>2</sup>, Yingjiu Chang <sup>1</sup>, Rong Ma <sup>1</sup>, Xiaohai Cao <sup>1,4</sup> and Shulin Wang <sup>1,3,4,\*</sup>

<sup>1</sup> College of Agriculture and Animal Husbandry, Qinghai University, Xining, 810016, China;

<sup>2</sup> Key Laboratory of Food Quality and Safety of Jiangsu Province, Institute of Food Safety and Nutrition, Jiangsu Academy of Agricultural Science, Nanjing, 210014, China;

<sup>3</sup> State Key Laboratory of Plateau Ecology and Agriculture, Qinghai University, Xining, 810016, China;

<sup>4</sup> United Laboratory of Food Research and Testing of Qinghai-Gansu Province, Xining, 810016, China;

† These authors contributed equally to this work.

\* Correspondence: Shulin Wang, E-mail: 1992990010@qhu.edu.cn

**Table S1.** Calibration curve results of 13 organic acids.

| Organic Acid  | Peak Order | Keep Time/Min | Regression Equation      | Correlation Coefficient( $R^2$ ) |
|---------------|------------|---------------|--------------------------|----------------------------------|
| GABA          | 1          | 3.947         | $y = 0.5291x - 0.0016$   | 1.0000                           |
| Tartaric acid | 2          | 5.250         | $y = 2.2249x - 0.0808$   | 0.9999                           |
| Citric acid   | 3          | 5.427         | $y = 69.3621x - 0.1281$  | 1.0000                           |
| Malic acid    | 4          | 5.570         | $y = 1.1467x + 0.0124$   | 1.0000                           |
| Shikimic acid | 5          | 6.080         | $y = 23.6795x + 0.1988$  | 0.9999                           |
| Lactic acid   | 6          | 6.350         | $y = 0.8297x + 0.0610$   | 1.0000                           |
| Acetic acid   | 7          | 6.960         | $y = 0.8060x + 0.2466$   | 1.0000                           |
| Oxalic acid   | 8          | 7.430         | $y = 1.6418x + 0.0204$   | 1.0000                           |
| Succinic acid | 9          | 7.897         | $y = 0.8693x + 0.0881$   | 1.0000                           |
| Ascorbic acid | 10         | 9.633         | $y = 0.1284x + 0.0051$   | 1.0000                           |
| Sorbic acid   | 11         | 10.873        | $y = 17.2447x - 2.2395$  | 0.9992                           |
| Fumaric acid  | 12         | 11.547        | $y = 108.6913x + 0.9134$ | 0.9998                           |
| Gallic acid   | 13         | 13.830        | $y = 147.2094x + 0.2695$ | 1.0000                           |

**Table S2.** The dynamics of metabolites and DPPH radical scavenging activity (DPPH) during BW fermentation.

| Index                      | 0 d             | 5 d              | 10 d             | 15 d             | 20 d             | 25 d             | 30 d           | 35 d            | 40 d          | 45 d            | 50 d            | 55 d            | 60 d            |
|----------------------------|-----------------|------------------|------------------|------------------|------------------|------------------|----------------|-----------------|---------------|-----------------|-----------------|-----------------|-----------------|
| Total acid (mg/mL)         | 4.03 ± 0.92g    | 10.03 ± 1.82f    | 9.95 ± 0.87f     | 17.71 ± 1.53d    | 15.28 ± 0.42e    | 18.92 ± 2.66cd   | 25.17 ± 0.9a   | 20.55 ± 2.03bc  | 21.91 ± 0.73b | 21.16 ± 0.1b    | 19.69 ± 0.79c   | 22.21 ± 1.67b   | 18.21 ± 0.97cd  |
| Total sugar (mg/mL)        | 109.76 ± 11.55a | 52.64 ± 6.19b    | 30.81 ± 1.93c    | 7.77 ± 1.31d     | 2.8 ± 0.06e      | 3.09 ± 0.12e     | 3.11 ± 0.14e   | 3.42 ± 0.12e    | 3.38 ± 0.08e  | 3.5 ± 0.17e     | 3.37 ± 0.07e    | 3.38 ± 0.03e    | 3.72 ± 0.15e    |
| Reducing sugar (mg/mL)     | 57.81 ± 0.26a   | 19.02 ± 0.04b    | 10.46 ± 0.05c    | 3.32 ± 0.25d     | 0.94 ± 0.02e     | 1.21 ± 0.03e     | 0.83 ± 0.02e   | 0.93 ± 0.04e    | 1.03 ± 0.02e  | 1.22 ± 0.03e    | 1.13 ± 0.02e    | 1.03 ± 0.01e    | 1.24 ± 0.10e    |
| Total anthocyanins (mg/mL) | 0.71 ± 0.01ab   | 0.74 ± 0.01a     | 0.69 ± 0.01bc    | 0.69 ± 0.01bc    | 0.68 ± 0.01bc    | 0.66 ± 0.01c     | 0.43 ± 0.01f   | 0.44 ± 0.01ef   | 0.47 ± 0.01e  | 0.69 ± 0.02bc   | 0.68 ± 0.01bc   | 0.62 ± 0.01d    | 0.67 ± 0.01c    |
| Total flavonoid (mg/mL)    | 0.97 ± 0.06g    | 2.52 ± 0.23e     | 2.81 ± 0.17de    | 3.33 ± 0.04cd    | 2.66 ± 0.05de    | 2.08 ± 0.05f     | 3.44 ± 0.01c   | 3.33 ± 0.04c    | 3.5 ± 0.04c   | 3.66 ± 0.06b    | 3.39 ± 0.02c    | 3.56 ± 0.03b    | 3.99 ± 0.06a    |
| Total polyphenol (mg/mL)   | 2.75 ± 0.01d    | 2.95 ± 0.01d     | 2.86 ± 0.02d     | 3.19 ± 0.04cd    | 2.74 ± 0.01d     | 2.3 ± 0.03e      | 3.31 ± 0.01c   | 3.58 ± 0.03b    | 3.57 ± 0.01b  | 3.7 ± 0.02b     | 3.62 ± 0.03b    | 3.73 ± 0.02b    | 3.93 ± 0.02a    |
| Total protein (mg/mL)      | 0.51 ± 0.05ce   | 0.55 ± 0.06bc    | 1.37 ± 0.03a     | 0.63 ± 0.03b     | 0.5 ± 0.04ce     | 0.41 ± 0.03ef    | 0.46 ± 0.06cef | 0.36 ± 0.04fg   | 0.39 ± 0.07f  | 0.48 ± 0.01ce   | 0.26 ± 0.04g    | 0.27 ± 0.06g    | 0.37 ± 0.04f    |
| SOD (mg/mL)                | 514.65 ± 4.27g  | 1721.61 ± 70.81a | 1725.46 ± 21.79a | 1188.82 ± 62.26b | 1168.28 ± 95.69b | 1104.09 ± 51.29b | 607.3 ± 86.88e | 575.08 ± 69.79f | 565 ± 38.46f  | 664.71 ± 29.91d | 648.09 ± 10.68d | 642.05 ± 14.96d | 754.35 ± 18.46c |

|          |                 |                 |                 |               |                 |                  |                 |                 |                 |                |                 |                 |                |
|----------|-----------------|-----------------|-----------------|---------------|-----------------|------------------|-----------------|-----------------|-----------------|----------------|-----------------|-----------------|----------------|
| Amylase  | 157.38 ± 11.46c | 137.03 ± 10.66d | 113.9 ± 19.65fg | 104.97 ± 5.4g | 125.02 ± 6.31ef | 131.46 ± 15.13de | 158.99 ± 27.01c | 104.38 ± 12.62g | 115.65 ± 26.69f | 169.53 ± 9.3b  | 169.82 ± 19.36b | 207.01 ± 15.12a | 196.46 ± 16.9a |
| DPPH (%) | 29.62 ± 3.64f   | 46.86 ± 1.66e   | 62.47 ± 2.31d   | 66.5 ± 3.21bc | 68.31 ± 2ab     | 66.63 ± 1.11bc   | 67.11 ± 0.71b   | 68.85 ± 0.37ab  | 68.57 ± 0.28ab  | 64.23 ± 1.48cd | 66.06 ± 0.68bc  | 70.29 ± 2.07a   | 63.93 ± 3.21d  |

Different letters in each row mean significant differences ( $p < 0.05$ ). Samples were collected at 0, 5th, 10th, 15th, 20th, 25th, 30th, 35th, 40th, 45th, 50th, 55th and 60th day, respectively.

**Table S3.** The contents of organic acids during BW fermentation (mg/mL).

| organic acid  | 0 d            | 5 d             | 10 d            | 15 d            | 20 d             | 25 d             | 30 d             | 35 d            | 40 d            | 45 d            | 50 d            | 55 d            | 60 d            |
|---------------|----------------|-----------------|-----------------|-----------------|------------------|------------------|------------------|-----------------|-----------------|-----------------|-----------------|-----------------|-----------------|
| Gallic acid   | 0.001 ± 0.000f | 0.002 ± 0.000f  | 0.008 ± 0.000c  | 0.005 ± 0.000de | 0.001 ± 0.000f   | 0.004 ± 0.000e   | 0.005 ± 0.000de  | 0.007 ± 0.000cd | 0.009 ± 0.000c  | 0.007 ± 0.000cd | 0.014 ± 0.001b  | 0.015 ± 0.001ab | 0.017 ± 0.001a  |
| GABA          | 0.387 ± 0.009d | 1.130 ± 0.004c  | 1.434 ± 0.008ab | 1.314 ± 0.010b  | 0.997 ± 0.010c   | 1.685 ± 0.009a   | 1.641 ± 0.003a   | 1.390 ± 0.003b  | 1.459 ± 0.008a  | 1.029 ± 0.009c  | 1.411 ± 0.007ab | 1.570 ± 0.012a  | 1.675 ± 0.001a  |
| Oxalic acid   | 0.844 ± 0.000a | 0.156 ± 0.000d  | 0.130 ± 0.001e  | 0.161 ± 0.001d  | 0.137 ± 0.000e   | 0.327 ± 0.001b   | 0.277 ± 0.000c   | 0.323 ± 0.000b  | 0.372 ± 0.002b  | 0.267 ± 0.000c  | 0.106 ± 0.000f  | 0.138 ± 0.000e  | 0.249 ± 0.000c  |
| Citric acid   | 0.011 ± 0.000a | 0.012 ± 0.000a  | 0.011 ± 0.000a  | 0.011 ± 0.000a  | 0.010 ± 0.000a   | 0.014 ± 0.001a   | 0.009 ± 0.000a   | 0.008 ± 0.000a  | 0.009 ± 0.001a  | 0.010 ± 0.000a  | 0.005 ± 0.001a  | 0.010 ± 0.001a  | 0.012 ± 0.000a  |
| Succinic acid | 0.760 ± 0.002  | -               | -               | -               | -                | -                | -                | -               | -               | -               | -               | -               | -               |
| Acetic acid   | -              | 0.063 ± 0.000d  | 0.253 ± 0.001a  | 0.252 ± 0.000a  | 0.041 ± 0.000e   | 0.171 ± 0.001b   | 0.096 ± 0.000c   | 0.007 ± 0.000f  | -               | -               | -               | -               | 0.173 ± 0.000b  |
| Lactic acid   | -              | 18.887 ± 0.003d | 10.279 ± 0.000f | 15.681 ± 0.001e | 19.982 ± 0.001cd | 22.208 ± 0.000ab | 21.793 ± 0.001bc | 23.147 ± 0.001a | 23.415 ± 0.000a | 16.622 ± 0.001e | 22.692 ± 0.000a | 23.427 ± 0.001a | 24.314 ± 0.001a |
| Malic acid    | 0.460 ± 0.001b | 0.014 ± 0.000j  | 0.046 ± 0.001h  | 0.030 ± 0.000i  | 0.018 ± 0.000j   | 0.037 ± 0.000hi  | 0.063 ± 0.000g   | 0.091 ± 0.000e  | 0.075 ± 0.001f  | 0.103 ± 0.000d  | 0.063 ± 0.000g  | 0.140 ± 0.000c  | 0.527 ± 0.002a  |
| Ascorbic acid | -              | 0.006 ± 0.000h  | 0.598 ± 0.000f  | -               | 0.810 ± 0.000e   | 0.810 ± 0.000e   | -                | 0.037 ± 0.000g  | -               | 2.213 ± 0.000d  | 3.476 ± 0.001b  | 5.170 ± 0.000a  | 3.390 ± 0.000c  |
| Sorbic acid   | 0.384 ± 0.001a | 0.388 ± 0.001a  | 0.417 ± 0.000a  | 0.398 ± 0.000a  | 0.401 ± 0.000a   | 0.394 ± 0.000a   | 0.378 ± 0.000a   | 0.372 ± 0.001a  | 0.379 ± 0.001a  | 0.377 ± 0.000a  | 0.408 ± 0.000a  | 0.436 ± 0.000a  | 0.437 ± 0.001a  |
| Tartaric acid | 0.425 ± 0.006a | 0.043 ± 0.001b  | 0.033 ± 0.002b  | 0.035 ± 0.001b  | 0.023 ± 0.000b   | 0.050 ± 0.001b   | -                | -               | -               | -               | -               | -               | -               |
| Fumaric acid  | -              | -               | -               | -               | -                | -                | -                | -               | -               | -               | -               | -               | -               |
| Shikimic acid | -              | -               | -               | -               | -                | -                | -                | -               | -               | -               | -               | -               | -               |

Note: Data are means ± standard deviations of experiments carried out in triplicate. Data in the same row with different letters are significantly different ( $p < 0.05$ ). Samples were collected at 0, 5th, 10th, 15th, 20th, 25th, 30th, 35th, 40th, 45th, 50th, 55th and 60th day, respectively. – means not detected.
